1 **Title: Genome engineering allows selective conversions of terephthalaldehyde to multiple**  
2 **valorized products in bacterial cells**

3 **Authors:** Roman M. Dickey, Michaela A. Jones, Neil D. Butler, Ishika Govil, Aditya M. Kunjapur

4 **Affiliations:** Department of Chemical & Biomolecular Engineering, University of Delaware,  
5 Newark DE 19716

6

7 Correspondence: Correspondence to A.M.K. at [kunjapur@udel.edu](mailto:kunjapur@udel.edu)

8

9 **Abstract:**

10 Deconstruction of polyethylene terephthalate (PET) plastic waste generates opportunities for  
11 valorization to alternative products. We recently designed an enzymatic cascade that could produce  
12 terephthalaldehyde (TPAL) from terephthalic acid. Here, we showed that the addition of TPAL to  
13 growing cultures of *Escherichia coli* wild-type strain MG1655 and an engineered strain for  
14 reduced aromatic aldehyde reaction (RARE) strain resulted in substantial reduction. We then  
15 investigated if we could mitigate this reduction using multiplex automatable genome engineering  
16 (MAGE) to create an *E. coli* strain with 10 additional knockouts in RARE. Encouragingly, we  
17 found this newly engineered strain enabled a 2.5-fold higher retention of TPAL over RARE after  
18 24h. We applied this new strain for the production of *para*-xylylenediamine (pXYL) and observed  
19 a 6.8-fold increase in pXYL titer compared to RARE. Overall, our study demonstrates the potential  
20 of TPAL as a versatile intermediate in microbial biosynthesis of chemicals that derived from waste  
21 PET.

22 **Topical Heading:**

23 Biomolecular Engineering, Bioengineering, Biochemicals, Biofuels, and Food

24 **Key words:**

25 Aldehyde, amine, biosynthesis, oxidoreductases, genome engineering

26

27

28

## 29 Introduction

30 The increasing societal dependence on plastics derived from petroleum and natural gas feedstocks  
31 has generated a demand to divert plastic waste from landfills to alternative products<sup>1-3</sup>. As such,  
32 tremendous efforts have been made to enhance the sustainability and renewability in polymer life  
33 cycles. Particularly, polyethylene terephthalate (PET) plastic, one of the most commonly produced  
34 polyesters, has garnered increasing attraction with the development of chemical deconstruction  
35 through synthetic approaches<sup>4-7</sup> or use of microbial PET-degrading enzymes<sup>8-11</sup>. Both enzymatic  
36 and chemical means of PET deconstruction toward the monomer unit terephthalic acid (TPA)  
37 generate opportunities to create higher value products or monomers for use in other classes of  
38 materials. In recent years, there have been several examples of platform chemicals produced  
39 biocatalytically from TPA, including gallic acid, pyrogallol, catechol, muconic acid, vanillic acid  
40 and vanillin made by live cells<sup>12,13</sup>. We recently identified carboxylic acid reductase enzymes that  
41 can efficiently generate the versatile dialdehyde terephthalaldehyde (TPAL) from TPA<sup>14</sup>. Our first  
42 step was to report the use of these enzymes *in vitro*, in part because it is unclear if these steps  
43 would function well in live cells given the potential instability and reactivity of TPAL<sup>15</sup>. However,  
44 the use of live cells to convert TPAL to useful chemical building blocks could provide a more cost  
45 effective and efficient biosynthetic process compared to the use of purified enzymes<sup>16-18</sup>.

46 Aldehydes can readily undergo numerous biological transformations to generate a large variety of  
47 potential products. Here, we envision utilizing the dialdehyde functionality of TPAL to access  
48 potential new opportunities in biosynthetic pathways, including asymmetrically functionalized  
49 products. Aldehyde-derived biosynthetic targets have ranged broadly<sup>19</sup>, including diamine  
50 polymer building blocks<sup>14,20</sup>, hydroxylated non-standard amino acids<sup>21-25</sup>, nitro alcohols<sup>26</sup>, and  
51 pharmaceutical mono-amine precursors<sup>27-29</sup>. Despite the biosynthetic possibilities available from

52 aldehydes, their redox instability in cellular environments due to endogenous oxidoreductase  
53 activity remains a key challenge<sup>30</sup>. First, we were curious to learn if we could take advantage of  
54 the endogenous enzymes that reduce TPAL in growing wild-type *E. coli* K-12 MG1655 cells to  
55 form the target diol 1,4-benzenedimethanol (BDM), a valuable building block that can be utilized  
56 for the production of pesticides, perfumes, or dyes<sup>31-34</sup>. While this instability can be utilized to  
57 rapidly reduce aldehydes into alcohols products like BDM, the strongly reductive natural cellular  
58 environment mitigates the use of aldehydes as a platform intermediate. To address this challenge,  
59 alcohol dehydrogenases (ADHs) or aldo-keto reductases (AKRs) in *E. coli* can be deleted and have  
60 resulted in sustainable improvements in stability for a wide set of aromatic and aliphatic aldehydes  
61 under aerobic conditions<sup>35-37</sup>. Of particular interest, the RARE.Δ6 strain (more commonly known  
62 as the RARE strain), an *E. coli* MG1655 strain named for its reduced aromatic aldehyde reduction,  
63 has alleviated the issue of aldehyde stability for many aromatic aldehydes<sup>37</sup>. Thus, we were also  
64 curious to learn if the RARE.Δ6 strain would allow us to convert TPAL to amines.

65 In this study, we investigated the stability of TPAL when supplemented to *E. coli* MG1655 and  
66 the RARE.Δ6 strain for the potential reduction by endogenous enzymes to the corresponding  
67 mono- or di- alcohols. We showed that TPAL is reduced by growing cell cultures of the MG1655  
68 strain and, to our surprise, TPAL is also reduced by growing cell cultures of the RARE.Δ6 strain.  
69 Interestingly, we discovered that we could use the RARE.Δ6 strain to stably accumulate the mono-  
70 aldehyde mono-alcohol 4-(hydroxymethyl) benzaldehyde (4HMB), which can be used in polymer  
71 applications as a precursor that is converted to an aryl bromide on route to polymers bearing an  
72 aldehyde at their chain ends<sup>38</sup>. To determine if we could overcome reduction of either aldehyde  
73 functional group by identifying and inactivating additional aldehyde reductases, we used multiplex  
74 automatable genome engineering (MAGE) to perform translational gene inactivation of up to 10

75 additional ADH and AKR genes, partly guided by RNA-seq that revealed a previously unreported  
76 target whose expression was elevated by TPAL challenge. After performing these additional gene  
77 inactivations, we created a strain (RARE.Δ16) that achieved significant retention of TPAL under  
78 aerobic growth conditions after 24 h. Finally, we showed that the use of this strain can lead to large  
79 improvements in the biosynthesis of the diamine pXYL from TPAL. Our study thus exploits  
80 genome engineering and heterologous expression to demonstrate selective routes to three distinct  
81 building blocks from TPAL.

## 82 **Results**

### 83 **TPAL is reduced in MG1655 and RARE.Δ6 under aerobic conditions**

84 We first sought to measure the stability of TPAL and the potential to produce a diol product under  
85 aerobic growth conditions (**Fig. 1A**). To evaluate whether reduction occurred during fermentation,  
86 we supplemented 5 mM TPAL to cultures of the *E. coli* MG1655 strain in LB media at mid-  
87 exponential phase. We grew cells in deep 96-well plates with 300 μL of media and used non-  
88 breathable aluminum seals to limit loss due to aldehyde volatility. We sampled the culture broth  
89 at two time points (4 h and 24 h after aldehyde addition) to gain some insight on the kinetics of  
90 aldehyde stability. In cultures of the wild-type *E. coli* MG1655 strain, we observed complete  
91 reduction of TPAL to BDM within 4 h, with this condition persisting after 24 h (**Fig. 1B**). We  
92 expect that this reduction is catalyzed by several endogenous aldehyde reductases in *E. coli* that in  
93 prior studies we have worked to identify and eliminate for the stabilization of aldehydes<sup>35–37,39</sup>.

94 We were also curious about whether we could improve or enable the conversion of TPAL to other  
95 products by inactivating endogenous ADHs and AKRs. As a first step towards testing whether  
96 inactivation of aldehyde reductases could eliminate TPAL reduction, we evaluated TPAL stability

97 in the previously engineered RARE.Δ6 strain under aerobic growth. Although we recently verified  
98 that the RARE.Δ6 strain reliably stabilizes a broad range of aromatic aldehydes under these  
99 conditions<sup>40</sup>, we were surprised to observe TPAL reduction at our first time point of 4 h with  
100 greater reduction seen at 24 h (**Fig. 1C**). However, we observed that cultures of the RARE.Δ6  
101 strain at 4 h and 24 h were able to stabilize the mono-aldehyde 4HMB, eliminating the complete  
102 reduction of TPAL to BDM. Thus, we can select production of BDM and 4HMB through the use  
103 of MG1655 and RARE.Δ6 respectively. While the RARE.Δ6 strain was able to provide enhanced  
104 TPAL stability over that of the wild-type MG1655 strain at 4 h, there is still significant reduction  
105 within our system at 24 h ( $0.22 \pm 0.07$  mM TPAL,  $2.70 \pm 0.27$  mM 4HMB).

#### 106 **Rational targeted gene inactivation enables TPAL stability**

107 Given the effectiveness of combinatorial gene deletions at limiting the reduction of aldehydes, we  
108 next investigated whether we could mitigate the reduction of TPAL observed using additional  
109 genome engineering. We used MAGE to inactivate potential genes responsible for the reduction  
110 of TPAL (**Fig. 2A**). Given the partial success of the RARE.Δ6 strain at increasing TPAL stability,  
111 we sought to identify additional ADH or AKR targets that could contribute to TPAL reduction.  
112 We first looked at additional ADH candidates reported in the previously engineered *E. coli* strain  
113 AL1728 which reported 13 aldehyde reductase deletions, several of which were not included in  
114 the RARE.Δ6 strain<sup>36</sup>. We generated an initial subset of 5 targeted gene deletions (S1:  $\Delta adhP$   
115  $\Delta fucO$   $\Delta eutG$   $\Delta yiaY$   $\Delta adhE$ ) to test if additional ADH knockouts could provide enhanced TPAL  
116 stabilization. In addition to investigating aldehyde reducing enzymes that had been deleted in  
117 previous studies, we also sought to determine whether other, nonobvious targets existed. To do so,  
118 we performed an RNA-seq experiment comparing conditions with and without addition of TPAL.  
119 We grew RARE.Δ6 in culture tubes in M9-glucose media, where media composition was defined.

120 After cultures reached mid-exponential phase, we then either added 1 mM of TPAL and sealed  
121 culture tubes or simply sealed culture tubes and grew cultures for an additional 1.5 h. We then  
122 harvested and submitted total RNA for sequencing at Novogene. We then examined the  
123 sequencing results for upregulated ADH and AKR transcripts in the TPAL addition case. We  
124 selected *gpr*, *eutE* and *gldA* as targeted genes for deletion as all had relatively high fold changes  
125 (> 1) (**Fig 2B**). We also selected *ybbO* as we observed a small positive fold change. Additionally,  
126 we selected *yghA*, for deletion despite the down regulation as we still observed relatively high  
127 transcript levels. With this, we then constructed a second subset of 5 additional ADHs and AKRs  
128 for deletions (S2:  $\Delta eutE \Delta gldA \Delta gpr \Delta ybbO \Delta yghA$ ).

129 We utilized MAGE to inactivate S1 and S2 for a total of 10 gene deletions. We used 10 total rounds  
130 of MAGE to inactivate each subset of targeted genes in the *E. coli* RARE. $\Delta$ 6 strain via introduction  
131 of in-frame stop codons within the first 100 codons. We then used multiplex allele-specific colony-  
132 PCR and confirmation by Sanger sequencing to obtain a variant containing the first subset of  
133 knockouts denoted as RARE. $\Delta$ 11 (RARE. $\Delta$ 6, S1) and a variant with all 10 knockouts denoted  
134 RARE. $\Delta$ 16 (RARE. $\Delta$ 11, S2) (**Fig 2C**). Next, we sought to determine the stability of 5 mM TPAL  
135 under aerobic growth conditions in both new strains along with their progenitor strains. We were  
136 excited to observe no detectable reduction of TPAL after 4 h in RARE. $\Delta$ 16 (**Fig. 2D**). When  
137 compared to RARE. $\Delta$ 6 at 24 h, we observed a 2.5-fold increase in TPAL concentration and a near  
138 10-fold decrease in the 4HMB concentration (**Fig. 2E**).

### 139 **Contribution of ALR knockouts to TPAL reduction**

140 We set out to determine the impact of each of the additional 10 KOs on TPAL stability because  
141 of the potential tradeoffs on fitness and heterologous expression associated with multiple gene  
142 knockouts. To reintroduce each gene, we transformed RARE. $\Delta$ 16 with a plasmid of each gene

143 cloned from the wild type MG1655. We then cultured RARE.Δ6, RARE.Δ16, and distinct  
144 RARE.Δ16 transformants that overexpress each gene that had been targeted for inactivation under  
145 aerobic conditions at 37 °C. At mid-exponential phase, we induced each culture and supplied 5  
146 mM TPAL. To our surprise, here we observed that when each targeted gene was individually  
147 overexpressed, only 4 (*ybbO*, *gpr*, *yiay*, *yghA*) out of the 10 resulted in TPAL reduction (**Fig. 3A**).  
148 Because MAGE is a rapid and combinatorial genome engineering strategy, we then chose to create  
149 a new strain to test the effect of introducing translational knockouts of only these four additional  
150 genes in RARE.Δ6, denoted as RARE.Δ10 (RARE.Δ6, Δ*ybbO* Δ*gpr* Δ*yiay* Δ*yghA*) (**Fig. 3B**). We  
151 then evaluated the stability of TPAL in aerobic conditions with RARE.Δ10 and observed  
152 comparable stability to that of RARE.Δ16 (**Fig. 3C**). This result indicated that the inactivation of  
153 only *ybbO*, *gpr*, *viaY* and *yghA* were required to achieve the increased TPAL stability.

#### 154 **Characterization of the RARE.Δ10 and RARE.Δ16 strains for biocatalysis applications**

155 With TPAL stability achieved, we then investigated whether the genome engineering performed  
156 impacted important parameters for functional application of these strains, namely effects on the  
157 cellular growth rate and protein overproduction. Thus, we investigated the growth rates across  
158 MG1655, RARE.Δ6, RARE.Δ10 and RARE.Δ16. We observed in both LB, a complex media, as  
159 well as MOPS EZ Rich-glucose, a defined media, there was no significant differences in the  
160 doubling time between the progenitor MG1655 strain and the engineered strains (**Fig. 4A, B, Table**  
161 **1**). However, we noticed there were small differences in growth rates towards late exponential and  
162 stationary phase, which resulted in lower final biomass concentrations of RARE.Δ16 for both  
163 media conditions. Furthermore, we used expression of a superfolder green fluorescent protein  
164 (sfGFP) reporter to compare protein production capacity of each previously mentioned strain. Each  
165 strain was transformed with a plasmid that harbored sfGFP and was grown in LB and MOPS EZ



166 Rich-glucose media. We observed similar production of sfGFP when normalized by OD<sub>600</sub> during  
167 exponential growth (**Fig. 4 C, D**). Additionally, we noted that RARE.Δ16 had slightly increased  
168 normalized sfGFP in both media conditions. With the comparable levels in RARE.Δ10 and  
169 RARE.Δ16 to that of MG1655, our engineered strains show limited deleterious impact to growth  
170 rate and ability to overexpress desired protein despite the inactivation of up to 16 total genes.

### 171 **Application of the RARE.Δ16 strain for improved amine synthesis**

172 We anticipate that the enhanced stability of TPAL in RARE.Δ16 affords opportunities to design  
173 potential biosynthesis pathways to convert TPAL to products besides BDM under aerobic  
174 fermentation conditions (**Fig. 5A**). To do so, we looked into the enzyme class of ω-transaminases  
175 (TAs), which are reversible pyridoxal-5'-phosphate (PLP)-dependent enzymes that catalyze the  
176 transfer of an amino group between donor and acceptor<sup>41</sup>. Here, we evaluated the capability of  
177 RARE.Δ16 strain for improved biosynthesis of the diamine *para*-xylylenediamine (pXYL). pXYL  
178 can be utilized as a component in a wide variety of materials including polyamides, polyimides,  
179 or non-isocyanate polyurethanes<sup>42,43</sup>. We transformed MG1655, RARE.Δ6, and RARE.Δ16 with  
180 a plasmid construct that inducibly expresses a His6x-tagged TA from *Chromobacterium violaceum*  
181 (CvTA) and an L-alanine dehydrogenase for amino donor recycling from *Bacillus subtilis*  
182 (BsAlaDH). We cultured these strains under aerobic conditions in LB media with 400 μM PLP,  
183 60 mM ammonium chloride and 100 mM L-alanine (amine donor). At mid-exponential phase  
184 (OD<sub>600</sub> = 0.5-0.8), we induced each culture and supplied 5 mM TPAL. In MG1655, we observed  
185 the unexpected reduction of TPAL to 4HMB with no detectable reduction to BDM or amination  
186 to pXYL after 24 h (**Fig.5B**). We hypothesize that the presence of the BsAlaDH could alter the co-  
187 factor pool and potentially limit further reduction towards BDM. We detected a similar result in  
188 RARE.Δ6 with the majority of TPAL reduced to 4HMB, however a small amount of pXYL was

189 produced. We observed that the RARE.Δ16 strain achieved nearly 7-fold enhancement in pXYL  
190 production compared to the RARE.Δ6 strain after 24 h ( $1.93 \pm 0.36$  mM RARE.Δ16,  $0.29 \pm 0.20$   
191 mM RARE.Δ6). Thus, we have shown that the genetic engineering approach that led to the creation  
192 of RARE.Δ16 is able to unlock avenues to convert TPAL to multiple sets of valuable building  
193 block chemicals, including pXYL.

194 **Discussion** In this work, we identified that the wild-type MG1655 *E. coli* strain rapidly reduces  
195 TPAL to BDM in metabolically active cells. We then evaluated TPAL stability in the engineered  
196 RARE.Δ6 strain. Here, we showed that the RARE.Δ6 strain provided a 17.6-fold change in TPAL  
197 stability over that of the wild-type MG1655 after 4 h. However, at the later time point of 24 h, we  
198 observed the RARE.Δ6 strain had less than  $8 \pm 2\%$  retention of TPAL. The RARE.Δ6 strain  
199 contains knockouts of six different genes that encode aldehyde reductases from two distinct  
200 families of enzymes AKR family and the NADH-dependent ADH family<sup>37</sup>. To determine if we  
201 could realize additional improvements in TPAL stability, we utilized the combinatorial genome  
202 engineering of MAGE to inactivate the translation of additional full-length ADHs and AKRs in  
203 the RARE.Δ6 strain. To identify potential genes that may be active on TPAL, we performed an  
204 RNAseq comparing conditions with and without supplementation of TPAL. With these genes  
205 identified and others identified in prior literature, we utilized MAGE to inactivate 10 additional  
206 genes into the RARE.Δ6 strain and deemed this strain RARE.Δ16 (*adhP*, *fucO*, *eutG*, *viaY*, *adhE*,  
207 *eutE*, *gldA*, *gpr*, *ybbO*, *yghA*). We observed that the RARE.Δ16 strain had increased TPAL stability  
208 over MG1655 and RARE.Δ6 at short (4 h) and even at long time scales (24 h). We found that  
209 RARE.Δ16 contained 6 knockouts that were not required for TPAL stability and further showed  
210 that the inactivation of only *ybbO*, *gpr*, *yiay* and *yghA* combined with the RARE.Δ6 knockouts are  
211 necessary to achieve the TPAL stability exhibited in RARE.Δ16.

212 By performing differential expression analysis after an aldehyde challenge experiment, our study  
213 is the first to reveal the relevance of *gpr* to the reduction of aldehydes featured in engineered  
214 biosynthetic pathways. The *gpr* gene encoded the only AKR from our targeted knockouts. It has  
215 been shown to have high activity on methylglyoxal and has been utilized for glyoxal and  
216 methylglyoxal detoxification in *E. coli*<sup>44-46</sup>. Interestingly, *gpr* has been shown to have slight  
217 activity towards benzaldehyde and relatively high activity towards 4-nitrobenzaldehyde<sup>44,45</sup>. The  
218 *yiaY*, *yghA* and *ybbO* genes have been knocked out for a variety of short and long chain aliphatic  
219 reductions<sup>35,36,47-50</sup>. However, the activity of *yiaY* and *yghA* on aromatic aldehydes has not been  
220 shown, with *ybbO* very recently shown to contribute to the reduction of the aromatic aldehyde  
221 cinnamaldehyde<sup>39</sup>. Given what previous literature suggests, our work highlights the ability of  
222 RNAseq to reveal potential ADH and AKR that otherwise would not have been clear targets for  
223 gene inactivation for TPAL stability.

224 The improved stability of TPAL using live microbial cells can provide a more cost effective and  
225 efficient biosynthesis pathway over purified enzymes to other useful chemical building blocks<sup>16-</sup>  
226 <sup>18</sup>. A fermentative process circumvents the need for cell lysis and enzyme purification that can  
227 lower biocatalyst cost compared to purified enzymes<sup>41,51-53</sup>. This difference in biocatalyst cost can  
228 increase with multi-enzyme cascades and the need for additional co-factor regenerating enzymes.  
229 However, fermentative processes are limited by aldehyde toxicity to microbial cells. While  
230 aldehyde products could inhibit cellular growth, aldehyde intermediates could be kept at a low  
231 steady-state concentration with downstream enzymes.

232 Here, we demonstrated that the RARE.Δ16 strain can offer a significant improvement for TPAL  
233 biocatalysis using cells expressing CvTA. We observed that the RARE.Δ16 strain outperformed  
234 the RARE.Δ6 strain by nearly 7-fold after 24 h. There are several synthetic pathways that involve

235 potential biosynthetic pathways involving TPAL as a substrate, intermediate, or product. In our  
236 previous work, we have shown potential biosynthesis pathways from PET deconstruction products  
237 like terephthalic acid or even mono-(2-hydroxyethyl) terephthalic acid to TPAL with the use of  
238 purified carboxylic acid reductases and a lipase. It is possible that other PLP-dependent enzymes  
239 could also utilize TPAL as a potential substrate. Our future work will look to identify whether  
240 RARE.Δ16 can serve as a platform strain to take advantage of the reactivity of aldehydes for the  
241 production of building blocks of diverse macromolecules, including non-standard amino acids<sup>54</sup>.

242

243

244 **Acknowledgements:** We acknowledge support from the following funding source: The Center for  
245 Plastics Innovation, an Energy Frontier Research Center funded by the U.S. Department of Energy  
246 (DOE), Office of Science, Basic Energy Sciences, under Award No. # DE-SC0021166.

247 **Author Contributions**

248 R.M.D designed and performed the MAGE to create RARE.Δ11. and RARE.Δ16, designed and  
249 conducted all stability experiments, analyzed data, prepared figures, and wrote the manuscript;  
250 M.A.J. initially documented ADH activity on TPAL, designed and performed MAGE to create  
251 RARE.Δ11. N.D.B performed the TPAL challenge and RNA-seq experiment as well as genome  
252 sequencing of RARE.Δ16. I.G. helped designed and performed MAGE to create RARE.Δ11.  
253 A.M.K. contributed to writing the manuscript, secured funding, provided oversight, and reviewed  
254 the manuscript.

255 **Conflict of Interest Statement:** None

256

257 Additional information including Materials and Methods can be found in the Supporting  
258 Information document available online.

259

260

261 **Figures**

262

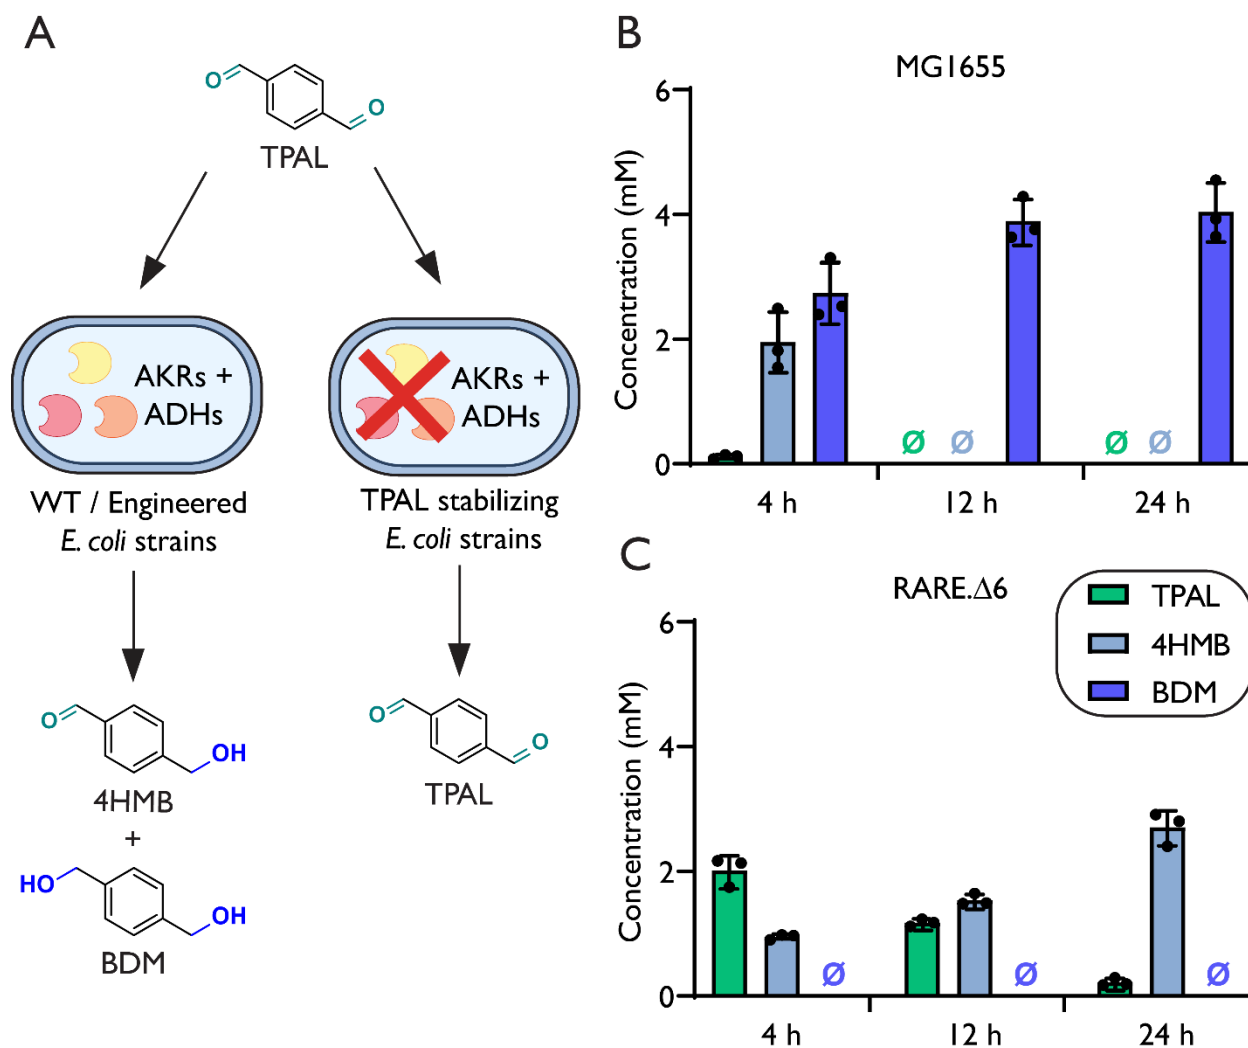

263

264 **Figure 1. Evaluation of the stability of TPAL when supplemented to aerobic cultures of *E.***

265 *coli*. **(A)** TPAL was added to culture media to determine its fate in the presence of growing *E. coli*

266 cells over time. **(B)** Cultures of wild-type *E. coli* MG1655 were grown in LB media at 37°C and

267 supplemented with 5 mM TPAL at mid-exponential phase. TPAL metabolites were tracked via

268 HPLC at 4 h, 12 h and 24 h. **(C)** Cultures of the previously reported *E. coli* RARE.Δ6 strain were

269 grown under identical conditions and TPAL metabolites were tracked via HPLC at 4 h, 12 h and  
 270 24 h. Data represents technical triplicates (n=3) where error bars represent the standard deviation  
 271 across triplicates. Null sign indicates no detectable quantities were observed.

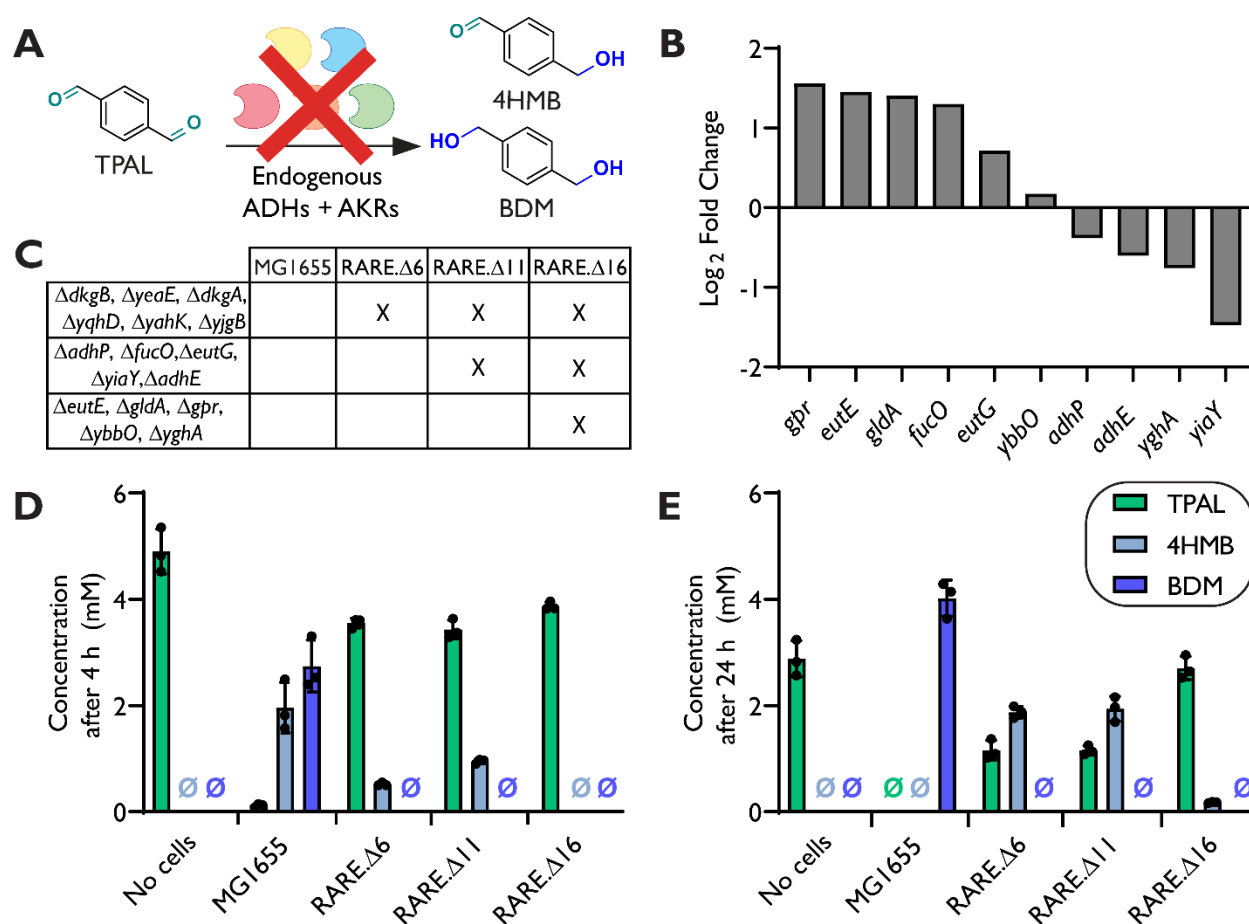

272  
 273 **Figure 2. Genomic knockout of aldehyde reductases (ALR) toward improved TPAL stability**  
 274 **in aerobic conditions.** (A) Using the *E. coli* RARE.Δ6 strain as a basis, MAGE was performed to  
 275 translationally knockout ALRs to generate two strains RARE.Δ11 (RARE.Δ6,  $\Delta adhP \Delta fucO$   
 276  $\Delta eutG \Delta yiaY \Delta adhE$ ) and RARE.Δ16 (RARE.Δ11,  $\Delta eutE \Delta gldA, \Delta gpr \Delta ybbO \Delta yghA$ ). (B) Log<sub>2</sub>  
 277 fold change of targeted genes were determined through a TPAL challenge RNA-seq. Data  
 278 represents TPAL supplementation in RARE.Δ6 compared to a RARE.Δ6 baseline in technical  
 279 duplicates (n=2). (C) Gene knockouts contained within each strain. (D&E) Cultures of wild-type

280 *E. coli* MG1655, RARE.Δ6, RARE.Δ11 and RARE.Δ16 were grown in LB media at 37°C and  
 281 supplemented with 5 mM TPAL at mid-exponential phase. TPAL metabolites were tracked via  
 282 HPLC at 4 h (D) and 24 h (E). Data represents technical triplicates (n=3) where error bars represent  
 283 the standard deviation across triplicates. Null sign indicates no detectable quantities were  
 284 observed.

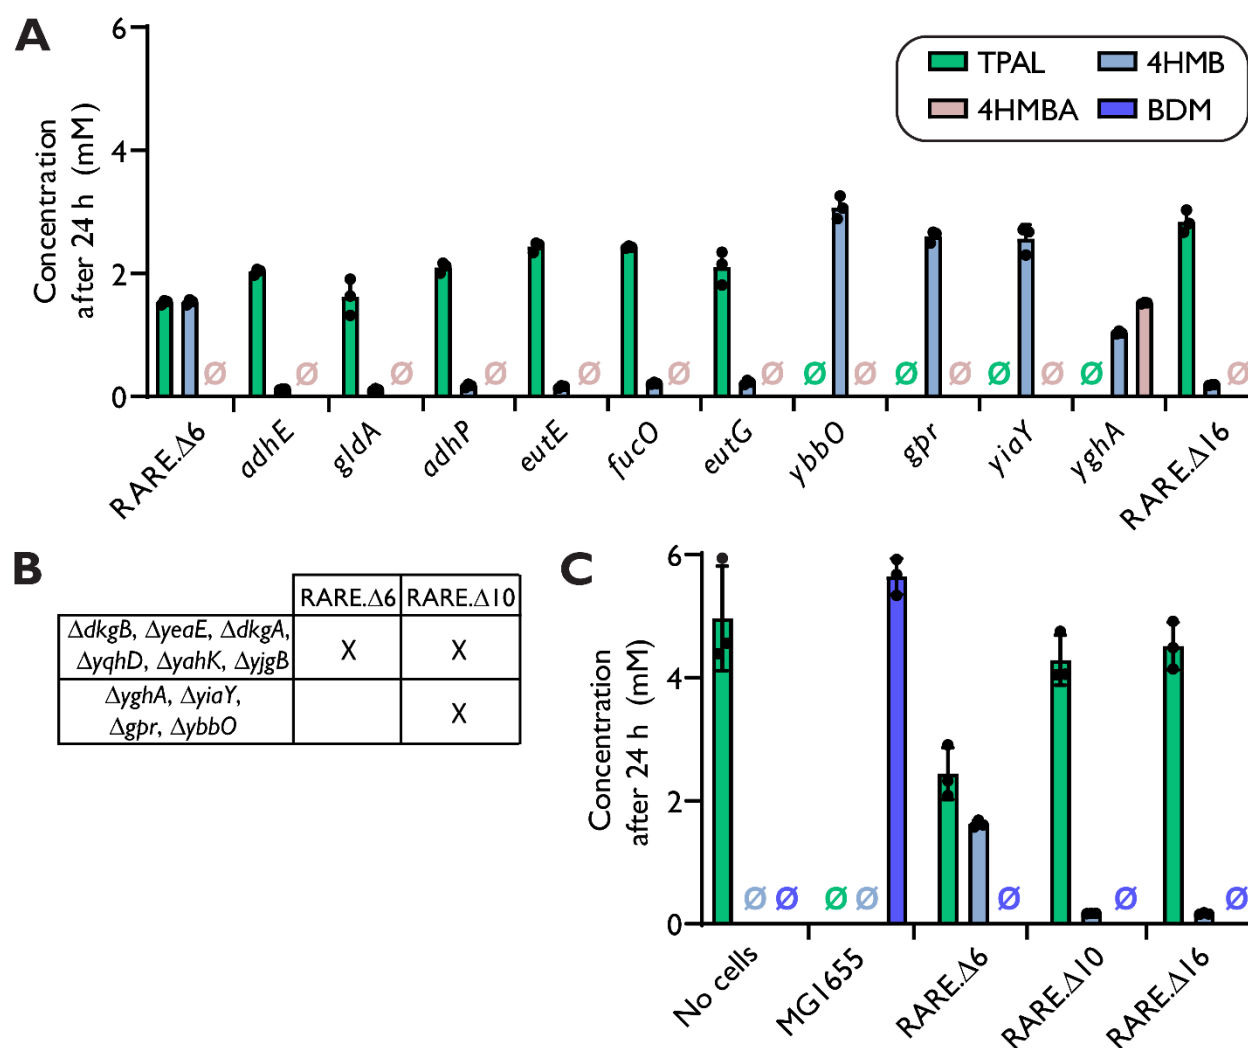

285

286 **Figure 3. Evaluation of overexpressed ALR activity on TPAL stability.** (A) Cultures of  
 287 RARE.Δ6, RARE.Δ10 and RARE.Δ16 transformed with a single plasmid for each individual ALR  
 288 gene from this study were grown in LB media at 37°C and supplemented with 5 mM TPAL and



289 then induced of targeted gene at mid-exponential phase and tracked via HPLC after 24 h (4HMBA  
290 indicates 4-hydroxymethyl benzoic acid). **(B)** Gene knockouts contained within RARE. $\Delta$ 10 strain.  
291 Using the *E. coli* RARE. $\Delta$ 6 strain as a basis, MAGE was performed to translationally knockout  
292 the 4 ALRs that showed reduction of TPAL when overexpressed to generate the RARE. $\Delta$ 10 strain  
293 (RARE. $\Delta$ 6,  $\Delta ybbO \Delta gpr \Delta yiaY \Delta yghA$ ). **(C)** Cultures of wild-type *E. coli* MG1655, RARE. $\Delta$ 6,  
294 RARE. $\Delta$ 10 and RARE. $\Delta$ 16 were grown in LB media at 37°C and supplemented with 5 mM TPAL  
295 at mid-exponential phase. TPAL metabolites were tracked via HPLC at 24 h. Data represents  
296 technical triplicates (n=3) where error bars represent the standard deviation across triplicates. Null  
297 sign indicates no detectable quantities were observed.

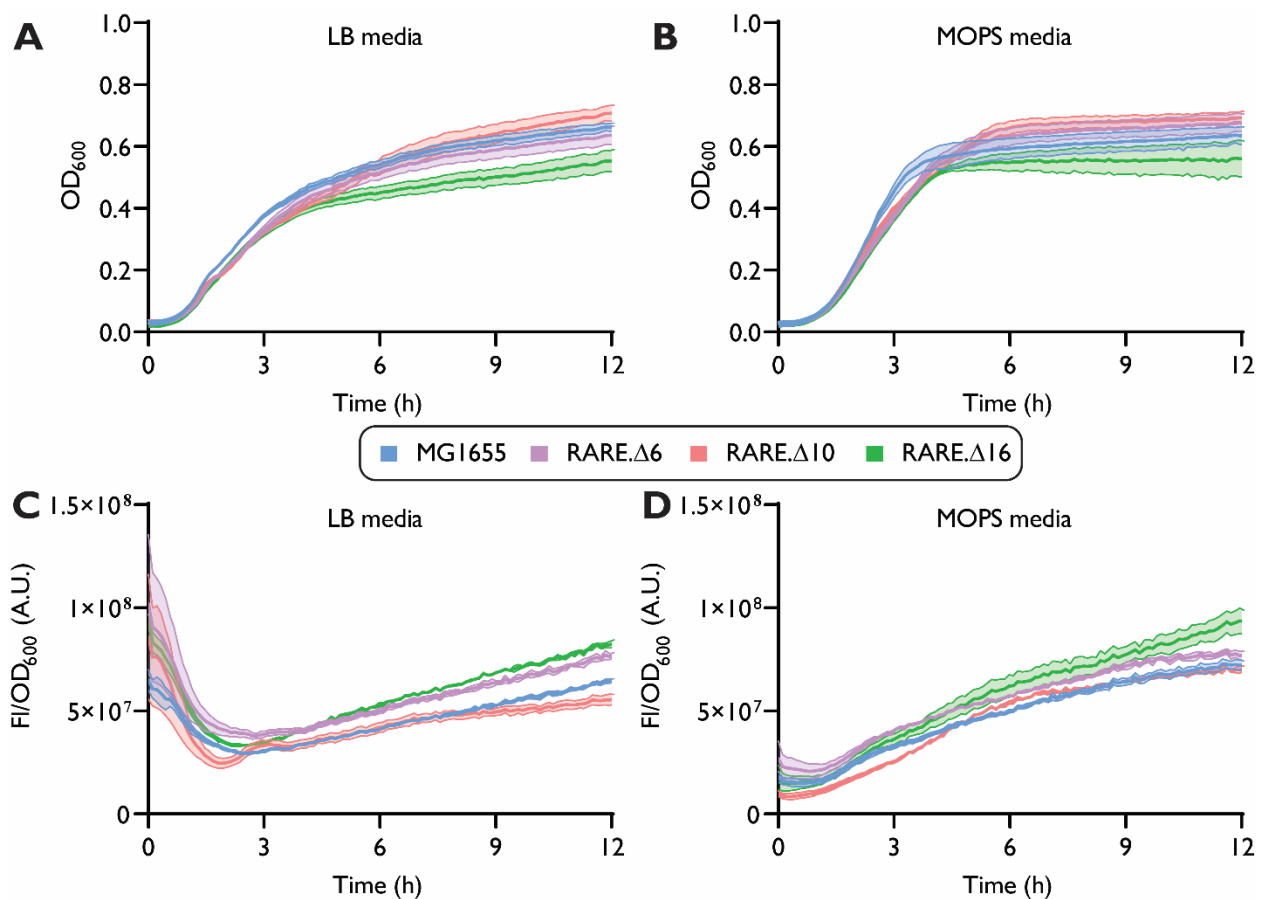

298

299 **Figure 4. Growth and protein production performance of engineered TPAL retaining**  
300 **strains.** Growth was monitored via optical density at 600 nm ( $OD_{600}$ ) in 96-well plate for 12 h in  
301 LB media **(A)** and in MOPS EZ Rich media **(B)**. Plasmid-based protein overexpression of  
302 superfolder green fluorescent protein (sfGFP) was monitored via 96-well plate in a plate reader for  
303 12 h by measuring fluorescence (ex: 488 nm, em: 525 nm) normalized by  $OD_{600}$  in both LB media  
304 **(C)** and MOPS EZ Rich media **(D)** (A.U. indicates arbitrary units). Data represents technical  
305 triplicates (n=3) where error bars represent the standard deviation across triplicates.

306 **Table 1.** Growth performance of engineered TPAL retaining stains. Data represents average of  
307 technical triplicates (n=3) where error represent the standard deviation across triplicates.

|                 | <b>LB MEDIA</b>     |                  | <b>MOPS MEDIA</b>   |                  | 308 |
|-----------------|---------------------|------------------|---------------------|------------------|-----|
|                 | Doubling time (min) | Final $OD_{600}$ | Doubling time (min) | Final $OD_{600}$ |     |
| <b>MG1655</b>   | 29.6 ± 1.5          | 0.66 ± 0.01      | 29.6 ± 1.5          | 0.66 ± 0.01      |     |
| <b>RARE.Δ6</b>  | 31.0 ± 0.4          | 0.64 ± 0.03      | 31.0 ± 0.4          | 0.64 ± 0.03      |     |
| <b>RARE.Δ10</b> | 34.1 ± 0.7          | 0.71 ± 0.02      | 34.1 ± 0.7          | 0.71 ± 0.02      |     |
| <b>RARE.Δ16</b> | 33.1 ± 0.5          | 0.55 ± 0.04      | 33.1 ± 0.5          | 0.55 ± 0.04      |     |

309

310

311

312

313

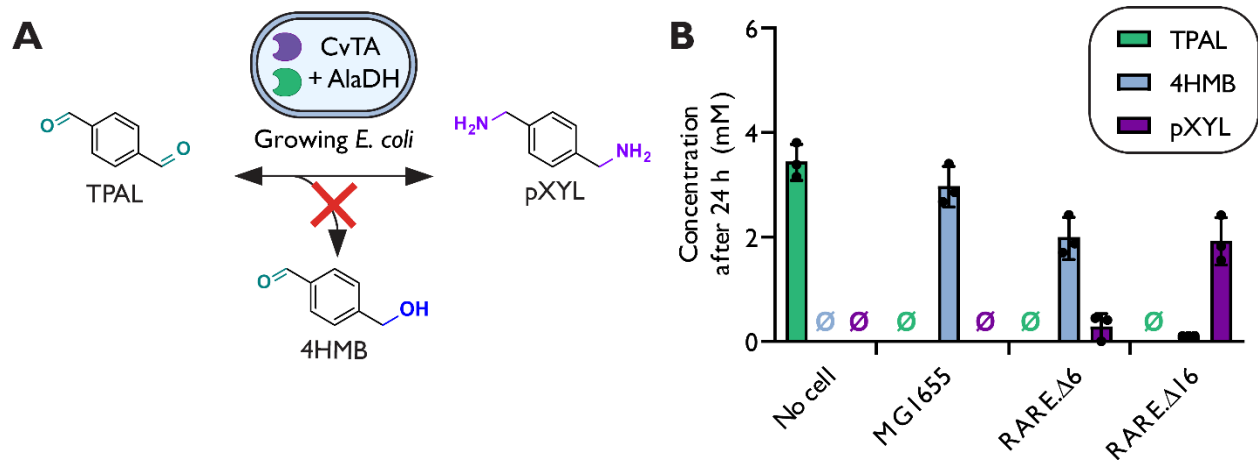

314

315 **Figure 5. Biosynthesis of pXYL in engineered strains expressing CvTA.** (A) We created *E. coli*  
316 strains containing CvTA and AlaDH that can convert TPAL to pXYL without additional reduction  
317 of TPAL. (B) Cultures of MG1655, RARE.Δ6 and RARE.Δ16 expressing CvTA were grown in  
318 LB media at 37°C and were supplemented with 100 mM L-alanine (amino donor) and 5 mM of  
319 TPAL at mid-exponential phase. TPAL, 4HMB, and pXYL concentrations were tracked via HPLC  
320 at 24 h. Data represents technical triplicates (n=3) where error bars represent the standard deviation  
321 across triplicates. Null sign indicates no detectable quantities were observed.

322 **References:**

- 323 1. Korley LTJ, Epps TH, Helms BA, Ryan AJ. Toward polymer upcycling—adding value  
324 and tackling circularity. *Science (80- )*. 2021;373(6550):66-69.  
325 doi:10.1126/science.abg4503
- 326 2. Fagnani DE, Tami JL, Copley G, Clemons MN, Getzler YDYL, McNeil AJ. 100th  
327 Anniversary of Macromolecular Science Viewpoint: Redefining Sustainable Polymers.  
328 *ACS Macro Lett*. 2021;10(1):41-53. doi:10.1021/acsmacrolett.0c00789
- 329 3. Zhao X, Boruah B, Chin KF, Đokić M, Modak JM, Soo H Sen. Upcycling to Sustainably  
330 Reuse Plastics. *Adv Mater*. 2022;34(25):2100843.  
331 doi:<https://doi.org/10.1002/adma.202100843>
- 332 4. Karayannidis GP, Chatziavgoustis AP, Achilias DS. Poly(ethylene terephthalate)  
333 recycling and recovery of pure terephthalic acid by alkaline hydrolysis. *Adv Polym*  
334 *Technol*. 2002;21(4):250-259. doi:<https://doi.org/10.1002/adv.10029>
- 335 5. Wang H, Liu Y, Li Z, Zhang X, Zhang S, Zhang Y. Glycolysis of poly(ethylene  
336 terephthalate) catalyzed by ionic liquids. *Eur Polym J*. 2009;45(5):1535-1544.  
337 doi:10.1016/J.EURPOLYMJ.2009.01.025
- 338 6. Yue QF, Wang CX, Zhang LN, Ni Y, Jin YX. Glycolysis of poly(ethylene terephthalate)  
339 (PET) using basic ionic liquids as catalysts. *Polym Degrad Stab*. 2011;96(4):399-403.  
340 doi:10.1016/J.POLYMDEGRADSTAB.2010.12.020
- 341 7. Wang L, Nelson GA, Toland J, Holbrey JD. Glycolysis of PET Using 1,3-  
342 Dimethylimidazolium-2-Carboxylate as an Organocatalyst. *ACS Sustain Chem Eng*.

- 343 2020;8(35):13362-13368. doi:10.1021/acssuschemeng.0c04108
- 344 8. Müller R-J, Schrader H, Profe J, Dresler K, Deckwer W-D. Enzymatic Degradation of  
345 Poly(ethylene terephthalate): Rapid Hydrolyse using a Hydrolase from *T. fusca*.  
346 *Macromol Rapid Commun.* 2005;26(17):1400-1405.  
347 doi:<https://doi.org/10.1002/marc.200500410>
- 348 9. Yoshida S, Hiraga K, Takehana T, et al. A bacterium that degrades and assimilates  
349 poly(ethylene terephthalate). *Science (80- )*. 2016;351(6278):1196-1199.  
350 doi:10.1126/science.aad6359
- 351 10. Lu H, Diaz DJ, Czarnecki NJ, et al. Machine learning-aided engineering of hydrolases for  
352 PET depolymerization. *Nature*. 2022;604(7907):662-667. doi:10.1038/s41586-022-04599-  
353 z
- 354 11. Wei R, von Haugwitz G, Pfaff L, et al. Mechanism-Based Design of Efficient PET  
355 Hydrolases. *ACS Catal.* 2022;12(6):3382-3396. doi:10.1021/acscatal.1c05856
- 356 12. Kim HT, Kim JK, Cha HG, et al. Biological Valorization of Poly(ethylene terephthalate)  
357 Monomers for Upcycling Waste PET. *ACS Sustain Chem Eng.* 2019;7(24):19396-19406.  
358 doi:10.1021/acssuschemeng.9b03908
- 359 13. Sadler JC, Wallace S. Microbial synthesis of vanillin from waste poly(ethylene  
360 terephthalate). *Green Chem.* 2021;23(13):4665-4672. doi:10.1039/D1GC00931A
- 361 14. Gopal MR, Dickey RM, Butler ND, et al. Reductive Enzyme Cascades for Valorization of  
362 Polyethylene Terephthalate Deconstruction Products. *ACS Catal.* Published online March  
363 24, 2023:4778-4789. doi:10.1021/acscatal.2c06219

- 364 15. Bayer T, Pfaff L, Branson Y, et al. Biosensor and chemo-enzymatic one-pot cascade  
365 applications to detect and transform PET-derived terephthalic acid in living cells.  
366 *iScience*. 2022;25(5):104326. doi:<https://doi.org/10.1016/j.isci.2022.104326>
- 367 16. Wachtmeister J, Rother D. Recent advances in whole cell biocatalysis techniques bridging  
368 from investigative to industrial scale. *Curr Opin Biotechnol*. 2016;42:169-177.  
369 doi:<https://doi.org/10.1016/j.copbio.2016.05.005>
- 370 17. Lin B, Tao Y. Whole-cell biocatalysts by design. *Microb Cell Fact*. 2017;16(1):106.  
371 doi:[10.1186/s12934-017-0724-7](https://doi.org/10.1186/s12934-017-0724-7)
- 372 18. de Carvalho CCCR. Whole cell biocatalysts: essential workers from Nature to the  
373 industry. *Microb Biotechnol*. 2017;10(2):250-263. doi:[https://doi.org/10.1111/1751-](https://doi.org/10.1111/1751-7915.12363)  
374 [7915.12363](https://doi.org/10.1111/1751-7915.12363)
- 375 19. Kunjapur A, Prather KL. Microbial Engineering for Aldehyde Synthesis. *Appl Environ*  
376 *Microbiol*. 2015;81(6):1892-1901. doi:[10.1128/AEM.03319-14](https://doi.org/10.1128/AEM.03319-14)
- 377 20. Fedorchuk TP, Khusnutdinova AN, Evdokimova E, et al. One-Pot Biocatalytic  
378 Transformation of Adipic Acid to 6-Aminocaproic Acid and 1,6-Hexamethylenediamine  
379 Using Carboxylic Acid Reductases and Transaminases. *J Am Chem Soc*.  
380 2020;142(2):1038-1048. doi:[10.1021/jacs.9b11761](https://doi.org/10.1021/jacs.9b11761)
- 381 21. Xu L, Wang L-C, Xu X-Q, Lin J. Characteristics of l-threonine transaldolase for  
382 asymmetric synthesis of  $\beta$ -hydroxy- $\alpha$ -amino acids. *Catal Sci Technol*. 2019;9(21):5943-  
383 5952. doi:[10.1039/C9CY01608B](https://doi.org/10.1039/C9CY01608B)
- 384 22. Xu L, Wang L-C, Su B-M, Xu X-Q, Lin J. Multi-enzyme cascade for improving  $\beta$ -

- 385 hydroxy- $\alpha$ -amino acids production by engineering L-threonine transaldolase and  
386 combining acetaldehyde elimination system. *Bioresour Technol.* 2020;310:123439.  
387 doi:<https://doi.org/10.1016/j.biortech.2020.123439>
- 388 23. Kumar P, Meza A, Ellis JM, Carlson GA, Bingman CA, Buller AR. l-Threonine  
389 Transaldolase Activity Is Enabled by a Persistent Catalytic Intermediate. *ACS Chem Biol.*  
390 2021;16(1):86-95. doi:10.1021/acscchembio.0c00753
- 391 24. Doyon TJ, Kumar P, Thein S, et al. Scalable and Selective  $\beta$ -Hydroxy- $\alpha$ -Amino Acid  
392 Synthesis Catalyzed by Promiscuous l-Threonine Transaldolase ObiH. *ChemBioChem.*  
393 2022;23(2):e202100577. doi:10.1002/CBIC.202100577
- 394 25. Ellis JM, Campbell ME, Kumar P, Geunes EP, Bingman CA, Buller AR. Biocatalytic  
395 synthesis of non-standard amino acids by a decarboxylative aldol reaction. *Nat Catal.*  
396 2022;5(2):136-143. doi:10.1038/s41929-022-00743-0
- 397 26. Purkarthofer T, Gruber K, Gruber-Khadjawi M, et al. A Biocatalytic Henry Reaction—  
398 The Hydroxynitrile Lyase from *Hevea brasiliensis* Also Catalyzes Nitroaldol Reactions.  
399 *Angew Chemie Int Ed.* 2006;45(21):3454-3456.  
400 doi:<https://doi.org/10.1002/anie.200504230>
- 401 27. France SP, Hussain S, Hill AM, et al. One-Pot Cascade Synthesis of Mono- and  
402 Disubstituted Piperidines and Pyrrolidines using Carboxylic Acid Reductase (CAR),  $\omega$ -  
403 Transaminase ( $\omega$ -TA), and Imine Reductase (IRED) Biocatalysts. *ACS Catal.*  
404 2016;6(6):3753-3759. doi:10.1021/acscatal.6b00855
- 405 28. Hepworth LJ, France SP, Hussain S, Both P, Turner NJ, Flitsch SL. Enzyme Cascades in  
406 Whole Cells for the Synthesis of Chiral Cyclic Amines. *ACS Catal.* 2017;7(4):2920-2925.

- 407           doi:10.1021/acscatal.7b00513
- 408   29.   Citoler J, Derrington SR, Galman JL, Bevinakatti H, Turner NJ. A biocatalytic cascade for  
409           the conversion of fatty acids to fatty amines. *Green Chem.* 2019;21(18):4932-4935.  
410           doi:10.1039/C9GC02260K
- 411   30.   Dickey RM, Forti AM, Kunjapur AM. Advances in engineering microbial biosynthesis of  
412           aromatic compounds and related compounds. *Bioresour Bioprocess.* 2021;8(1):91.  
413           doi:10.1186/s40643-021-00434-x
- 414   31.   Chen Y, Yang Z, Guo C-X, et al. Using alcohols as alkylation reagents for 4-  
415           cyanopyridinium and N,N'-dialkyl-4,4'-bipyridinium and their one-dimensional  
416           iodoplumbates. *CrystEngComm.* 2011;13(1):243-250. doi:10.1039/C0CE00309C
- 417   32.   Luo Y, Zhang S, Ma Y, Wang W, Tan B. Microporous organic polymers synthesized by  
418           self-condensation of aromatic hydroxymethyl monomers. *Polym Chem.* 2013;4(4):1126-  
419           1131. doi:10.1039/C2PY20914D
- 420   33.   Monsigny L, Berthet J-C, Cantat T. Depolymerization of Waste Plastics to Monomers and  
421           Chemicals Using a Hydrosilylation Strategy Facilitated by Brookhart's Iridium(III)  
422           Catalyst. *ACS Sustain Chem Eng.* 2018;6(8):10481-10488.  
423           doi:10.1021/acssuschemeng.8b01842
- 424   34.   Westhues S, Idel J, Klankermayer J. Molecular catalyst systems as key enablers for  
425           tailored polyesters and polycarbonate recycling concepts. *Sci Adv.* 2023;4(8):eaat9669.  
426           doi:10.1126/sciadv.aat9669
- 427   35.   Rodriguez G, Atsumi S. Isobutyraldehyde production from *Escherichia coli* by removing



- 428 aldehyde reductase activity. *Microb Cell Fact.* 2012;11(1):90. doi:10.1186/1475-2859-11-  
429 90
- 430 36. Rodriguez GM, Atsumi S. Toward aldehyde and alkane production by removing aldehyde  
431 reductase activity in Escherichia coli. *Metab Eng.* 2014;25:227-237.  
432 doi:<http://dx.doi.org/10.1016/j.ymben.2014.07.012>
- 433 37. Kunjapur AM, Tarasova Y, Prather KLJ. Synthesis and Accumulation of Aromatic  
434 Aldehydes in an Engineered Strain of Escherichia coli. *J Am Chem Soc.*  
435 2014;136(33):11644-11654. doi:10.1021/ja506664a
- 436 38. Kakuchi R, Okura Y. The Passerini three-component reaction of aldehyde end-  
437 functionalized polymers via RAFT polymerization using chain transfer agents featuring  
438 aldehyde. *Polym J.* 2020;52(9):1057-1066. doi:10.1038/s41428-020-0368-z
- 439 39. Bang HB, Son J, Kim SC, Jeong KJ. Systematic metabolic engineering of Escherichia coli  
440 for the enhanced production of cinnamaldehyde. *Metab Eng.* 2023;76:63-74.  
441 doi:<https://doi.org/10.1016/j.ymben.2023.01.006>
- 442 40. Butler ND, Anderson SR, Dickey RM, Nain P, Kunjapur AM. Combinatorial gene  
443 inactivation of aldehyde dehydrogenases mitigates aldehyde oxidation catalyzed by E. coli  
444 resting cells. *Metab Eng.* Published online 2023.  
445 doi:<https://doi.org/10.1016/j.ymben.2023.04.014>
- 446 41. Slabu I, L. Galman J, C. Lloyd R, J. Turner N. Discovery, Engineering, and Synthetic  
447 Application of Transaminase Biocatalysts. *ACS Catal.* 2017;7(12):8263-8284.  
448 doi:10.1021/acscatal.7b02686

- 449 42. Stavila E, Alberda van Ekenstein GOR, Loos K. Enzyme-Catalyzed Synthesis of  
450 Aliphatic–Aromatic Oligoamides. *Biomacromolecules*. 2013;14(5):1600-1606.  
451 doi:10.1021/bm400243a
- 452 43. Nanclares J, Petrović ZS, Javni I, Ionescu M, Jaramillo F. Segmented polyurethane  
453 elastomers by nonisocyanate route. *J Appl Polym Sci*. 2015;132(36).  
454 doi:<https://doi.org/10.1002/app.42492>
- 455 44. Grant AW, Steel G, Waugh H, Ellis EM. A novel aldo-keto reductase from *Escherichia*  
456 *coli* can increase resistance to methylglyoxal toxicity. *FEMS Microbiol Lett*.  
457 2003;218(1):93-99. doi:10.1111/j.1574-6968.2003.tb11503.x
- 458 45. Junsang K, Insook K, Seokho Y, Bumchan M, Kyungmin K, Chankyu P. Conversion of  
459 Methylglyoxal to Acetol by *Escherichia coli* Aldo-Keto Reductases. *J Bacteriol*.  
460 2005;187(16):5782-5789. doi:10.1128/JB.187.16.5782-5789.2005
- 461 46. Lee C, Kim I, Park C. Glyoxal detoxification in *Escherichia coli* K-12 by NADPH  
462 dependent aldo-keto reductases. *J Microbiol*. 2013;51(4):527-530. doi:10.1007/s12275-  
463 013-3087-8
- 464 47. Jang H-J, Ha B-K, Zhou J, Ahn J, Yoon S-H, Kim S-W. Selective retinol production by  
465 modulating the composition of retinoids from metabolically engineered *E. coli*. *Biotechnol*  
466 *Bioeng*. 2015;112(8):1604-1612. doi:<https://doi.org/10.1002/bit.25577>
- 467 48. Xiong M, Yu P, Wang J, Zhang K. Improving Engineered *Escherichia coli*  
468 strains for High-level Biosynthesis of Isobutyrate. *AIMS Bioeng*. 2015;2(2):60-74.  
469 doi:10.3934/bioeng.2015.2.60

- 470 49. Fatma Z, Jawed K, Mattam AJ, Yazdani SS. Identification of long chain specific aldehyde  
471 reductase and its use in enhanced fatty alcohol production in *E. coli*. *Metab Eng.*  
472 2016;37:35-45. doi:<https://doi.org/10.1016/j.ymben.2016.04.003>
- 473 50. Fatma Z, Hartman H, Poolman MG, et al. Model-assisted metabolic engineering of  
474 *Escherichia coli* for long chain alkane and alcohol production. *Metab Eng.* 2018;46:1-12.  
475 doi:[10.1016/J.YMBEN.2018.01.002](https://doi.org/10.1016/J.YMBEN.2018.01.002)
- 476 51. Torres S, Pandey A, Castro GR. Organic solvent adaptation of Gram positive bacteria:  
477 Applications and biotechnological potentials. *Biotechnol Adv.* 2011;29(4):442-452.  
478 doi:<https://doi.org/10.1016/j.biotechadv.2011.04.002>
- 479 52. Tufvesson P, Lima-Ramos J, Nordblad M, Woodley JM. Guidelines and Cost Analysis for  
480 Catalyst Production in Biocatalytic Processes. *Org Process Res Dev.* 2011;15(1):266-274.  
481 doi:[10.1021/op1002165](https://doi.org/10.1021/op1002165)
- 482 53. Song W, Wang J-H, Wu J, Liu J, Chen X-L, Liu L-M. Asymmetric assembly of high-  
483 value  $\alpha$ -functionalized organic acids using a biocatalytic chiral-group-resetting process.  
484 *Nat Commun.* 2018;9(1):3818. doi:[10.1038/s41467-018-06241-x](https://doi.org/10.1038/s41467-018-06241-x)
- 485 54. Jones MA, Butler ND, Anderson SR, et al. Discovery of L-threonine transaldolases for  
486 enhanced biosynthesis of beta-hydroxylated amino acids. *Under Revis.*

487

488
